# Supplementary material
Source: Springer Nature journal article supplement (https://www.springermedizin.de/resource/supplementary/12885_2011_3228_MOESM1_ESM.pdf/9463104)

**A**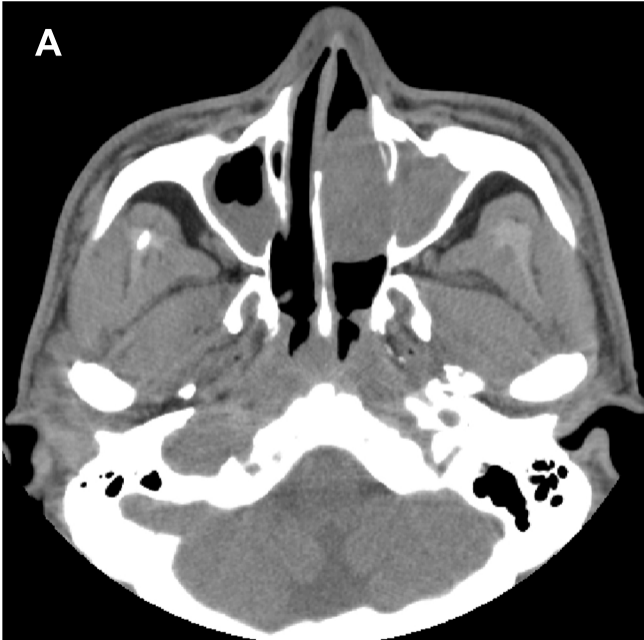**B**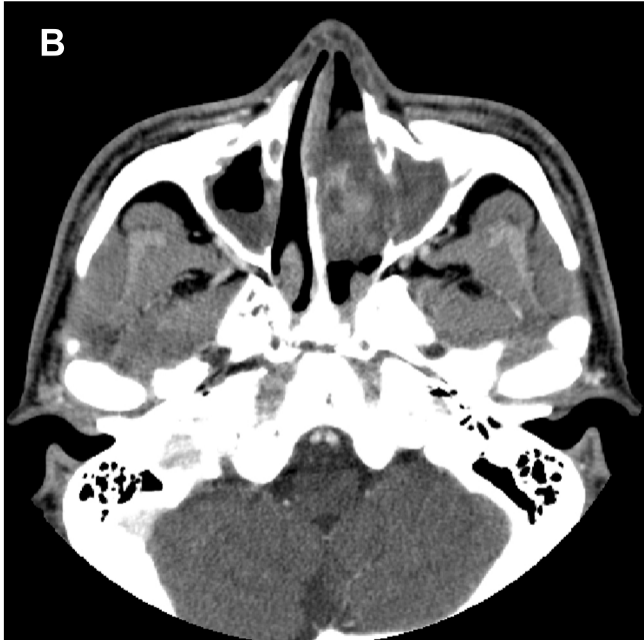

Supplement: MOESM1 [file 9463104]
